# Supplementary material for: Antioxidant and anti-inflammatory activities of durian (Durio zibethinus Murr.) pulp, seed and peel flour
Source: PeerJ. 2022 Feb 7;10:e12933. doi: 10.7717/peerj.12933 (PMC8830296; doi:10.7717/peerj.12933)
Supplement: Supplemental Information 1 [file peerj-10-12933-s001.xlsx]

## Sheet: Sheet1
TPC									t-test (p-value)
	Flour extracts	1	2	3	Mean	SD			TPC	MP	MS	CPU	CP	CS
	Monthong								MPU	0.0989	0.0007	0.0027	0.0996	<0.0001
	Pulp (MPu)	3359.56	3198.66	2982.75	3180.32	189.073			MP		0.0008	0.0042	0.5728	<0.0001
	Peel (MP)	3633.72	3374.41	3407.82	3471.98	141.061			MS			0.0229	0.0135	<0.0001
	Seed (MS)	4195.15	4225.92	4211.88	4210.98	15.4046			CPU				0.0069	0.36
	Chanee								CP					0.0008
	Pulp (CPu)	5679.95	5476.92	4699.24	5285.37	517.655
	Peel (CP)	3783.69	3284.92	3661.6	3576.74	259.989
	Seed (CS)	5002.98	4904.64	5015.9	4974.51	60.8502
ABTS scavenging									t-test (p-value)
	Replicate No.	MPu	MP	MS	CPu	CP	CS		ABTS	MP	MS	CPU	CP	CS
	1	17.1744	19.1001	19.1001	25.026	10.3216	6.60424		MPU	0.1067	0.5041	0.0004	0.0003	<0.0001
	2	15.5623	16.9909	7.22596	24.1043	10.7838	6.97039		MP		0.3039	0.0012	0.0003	<0.0001
	3	16.567	18	15.22	26.2039	10.3316	6.8999		MS			0.0337	0.3901	0.115
									CPU				<0.0001	<0.0001
									CP					<0.0001
Nitric oxide scavenging
	Replicate No.	MPu	MP	MS	CPu	CP	CS		t-test (p-value)
	1	506.618	193.411	73.8958	328.658	356.27	389.936		Nitric oxide scavenging	MP	MS	CPU	CP	CS
	2	207.346	86.9151	41.3337	823.16	349.526	119.208		MPU	0.0824	0.0258	0.2659	0.9504	0.4336
	3	358.999	156.99	56	567.993	350	259.905		MP		0.0531	0.043	0.0028	0.2593
									MS			0.0226	<0.0001	0.0646
									CPU				0.1961	0.1234
									CP					0.2887
Superoxide scavenging
	Replicate No.	MPu	MP	MS	CPu	CP	CS		t-test (p-value)
	1	33.6099	89.8605	80.3976	66.3907	80.3976	172.305		Superoxide	MP	MS	CPU	CP	CS
	2	79.1533	92.1291	96.3296	115.408	96.3296	151.208		MPU	0.2331	0.1219	0.1905	0.1551	0.0027
	3	67.9843	66.2	88.9094	214.186	177.6	180.106		MP		0.5728	0.3279	0.3204	0.0021
									MS			0.3764	0.3866	0.0013
									CPU				0.8058	0.4635
									CP					0.1872
Hydroxy radical scavenging
	Replicate No.	MPu	MP	MS	CPu	CP	CS		t-test (p-value)
	1	236.03	110.007	2.06558	115.38	685.217	99.8507		Hydroxy radical scavenging	MP	MS	CPU	CP	CS
	2	133.71	143.749	2.49655	126.085	561.723	100		MPU	0.1216	0.0034	0.0767	0.001	0.0412
	3	210.425	135.99	2.26353	118.898	590.647	105.99		MP		0.0002	0.4109	0.0002	0.0547
									MS			<0.0001	<0.0001	<0.0001
									CPU				0.0002	0.0083
									CP					0.0002
Metal ion chelating
	Replicate No.	MPu	MP	MS	CPu	CP	CS		t-test (p-value)
	1	470.981	184.184	62.6792	441.312	318.556	53.4322		Metal ion chelating	MP	MS	CPU	CP	CS
	2	461.166	160.999	122.499	595.752	778.979	56.3772		MPU	<0.0001	<0.0001	0.4052	0.6871	<0.0001
	3	465.94	180.9	87.1318	488.675	476.248	50.98		MP		0.0109	0.002	0.0612	<0.0001
									MS			0.001	0.0334	0.1
									CPU				0.916	0.0006
									CP					0.0252
Cytotoxicity
	Replicate No.	MPu	MP	MS	CPu	CP	CS		t-test (p-value)
	1	156.94	179.44	52.49	171.92	159.45	150		Cytotoxicity	MP	MS	CPU	CP	CS
	2	103.06	160.42	32.71	150.13	108.95	205.314		MPU	0.1481	0.0064	0.2138	0.6727	0.1471
	3	149.848	165.69	44.482	168.454	177.806	179.783		MP		0.0001	0.6001	0.4067	0.5926
									MS			0.0002	0.0078	0.0014
									CPU				0.533	0.44
									CP					0.3191
Anti-nitric oxide production activity
	Replicate No.	MPu	MP	MS	CPu	CP	CS		t-test (p-value)
	1	33.98	23.56	140.03	28	38.16	21.96		Anti-nitric oxide production activity	MP	MS	CPU	CP	CS
	2	35	25	145	31.82	41	26		MPU	<0.0001	<0.0001	0.0658	0.012	0.002
	3	33.9999	23.798	139.942	32.42	37.802	25.842		MP		<0.0001	0.0104	0.0002	0.7473
		#NAME?	24.1193	141.657	30.7467	38.9873	24.6007		MS			<0.0001	<0.0001	<0.0001
									CPU				0.0086	0.0325
									CP					0.001
